1 **Responses of the putative trachoma vector, *Musca sorbens*, to**  
2 **volatile semiochemicals from human faeces**

3

4

5 Ailie Robinson<sup>1\*</sup>, Julie Bristow<sup>1,2,#a</sup>, Matthew V. Holl<sup>1,#b</sup>, Pateh Makalo<sup>3,#c</sup>, Wondu Alemayehu<sup>4</sup>,  
6 Robin L. Bailey<sup>5</sup>, David McLeod<sup>6</sup>, Michael A. Birkett<sup>2,#d</sup>, John C. Caulfield<sup>2,#d</sup>, Virginia Sarah<sup>7</sup>, John  
7 A. Pickett<sup>2,#e</sup>, Sarah Dewhurst<sup>8</sup>, Vanessa Chen-Hussey<sup>8</sup>, Christine M. Woodcock<sup>2,#d</sup>, Umberto  
8 D'Alessandro<sup>3,#c</sup>, Anna Last<sup>5</sup>, Matthew J. Burton<sup>5</sup>, Steve W. Lindsay<sup>9</sup>, James G. Logan<sup>1</sup>

9

10

11

12 <sup>1</sup> Department of Disease Control, London School of Hygiene and Tropical Medicine, Keppel Street,  
13 London, WC1E 7HT, UK.

14

15 <sup>2</sup>Biological Chemistry and Crop Protection, Rothamsted Research, Harpenden, Hertfordshire, AL5  
16 2JQ, UK.

17

18 <sup>3</sup>Medical Research Council Unit, The Gambia, The Gambia.

19

20 <sup>4</sup>The Fred Hollows Foundation, P.O. Box 6307, Addis Ababa, Ethiopia.

21

22 <sup>5</sup>Department of Clinical Research, London School of Hygiene and Tropical Medicine, Keppel Street,  
23 London, WC1E 7HT, UK.

24

25 <sup>6</sup>Department of Infectious Disease Epidemiology, London School of Hygiene and Tropical  
26 Medicine, Keppel Street, London, WC1E 7HT, UK.

27

28 <sup>7</sup>Global Partnerships Executive, The Fred Hollows Foundation, 12-15 Crawford Mews, York Street,  
29 London W1H1LX

30

31 <sup>8</sup>ARCTEC, Chariot Innovations Ltd, London School of Hygiene and Tropical Medicine, Keppel Street,  
32 London, WC1E 7HT, UK.

33

34 <sup>9</sup>Department of Biosciences, Durham University, Durham, County Durham DH1 3LE, UK.

35

36

37

38 <sup>#a</sup>Current address: the University of Sussex, Falmer, Brighton, BN1 9RH, UK.

39

40 <sup>#b</sup>Current address: Entocycle Ltd., 29 Shand St, SE1 2ES, UK.

41

42 #<sup>c</sup>Current address: Disease Control and Elimination, Medical Research Council Unit The Gambia at  
43 the London School of Hygiene and Tropical Medicine, Fajara, The Gambia.

44

45 #<sup>D</sup>Current address: Biointeractions and Crop Protection, Rothamsted Research, Harpenden,  
46 Hertfordshire, AL5 2JQ, UK.

47

48 #<sup>E</sup>Current address: School of Chemistry, Cardiff University, Cardiff CF10 3AT, United Kingdom.

49

50

51

52 \*Corresponding author

53 Email: Ailie.robinson@lshtm.ac.uk

54 **Abstract**

55 **Background**

56 The putative vector of trachoma, *Musca sorbens*, prefers to lay its eggs on human faeces on the  
57 ground. This study sought to determine whether *M. sorbens* females were attracted to volatile  
58 odours from human faeces in preference to odours from the faeces of other animals, and to  
59 determine whether specific volatile semiochemicals mediate selection of the faeces.

60

61 **Methodology/Principal findings**

62 Traps baited with the faeces of humans and local domestic animals were used to catch flies at two  
63 trachoma-endemic locations in The Gambia and one in Ethiopia. At all locations, traps baited with  
64 faeces caught more female *M. sorbens* than control traps baited with soil, and human faeces was  
65 the most successful bait compared with soil (mean rate ratios 44.40, 61.40, 10.50 [ $P<0.001$ ]; 8.17  
66 for child faeces [ $P=0.004$ ]). Odours from human faeces and some domestic animals were sampled  
67 by air entrainment. Extracts of the volatiles from human faeces were tested by coupled gas  
68 chromatography-electroantennography with laboratory-reared female *M. sorbens*. Twelve  
69 compounds were electrophysiologically active and tentatively identified by coupled mass  
70 spectrometry-gas chromatography, these included cresol, indole, 2-methylpropanoic acid,  
71 butanoic acid, pentanoic acid and hexanoic acid.

72

73 **Conclusions/Significance**

74 It is possible that some of these volatiles govern the strong attraction of *M. sorbens* flies to human  
75 faeces. If so, a synthetic blend of these chemicals, at the correct ratios, may prove to be a highly

76 attractive lure. This could be used in odour-baited traps for monitoring or control of this species  
77 in trachoma-endemic regions.

78

## 79 **Author summary**

80 *Musca sorbens*, also known as the Bazaar Fly, visits people's faces to feed on ocular and nasal  
81 discharge. While feeding, *M. sorbens* can transmit *Chlamydia trachomatis*, the bacterium that  
82 causes the infectious eye disease trachoma. Around 1.9 million people worldwide are visually  
83 impaired or blind from this disease. Although it is believed that *M. sorbens* transmits trachoma,  
84 very few studies have looked at ways to control this fly. A large-scale trial has shown that control  
85 of fly populations with insecticide reduces active trachoma disease prevalence. Odour-baited  
86 traps for the suppression of disease vector populations are an attractive option as there is no  
87 widespread spraying of insecticide, however, highly attractive baits are critical to their success.  
88 Here we demonstrate that the preference of these flies for breeding in human faeces is probably  
89 mediated by odour cues, and we isolate chemicals in the odour of human faeces that cause a  
90 response in the antennae of *M. sorbens*. These compounds may play a role in the specific  
91 attractiveness of human faeces to these flies, perhaps by being present in greater amounts or at  
92 favourable ratios. These may be developed into a chemical lure for odour-baited trapping to  
93 suppress *M. sorbens* populations.

94

95

96

## 97 **Introduction**

98 The Bazaar Fly, *Musca sorbens*, is the putative vector of the blinding eye disease trachoma [1].  
99 Adult *M. sorbens* feed on ocular and nasal secretions to obtain nutrition and liquid [2], and in  
100 doing so can transmit *Chlamydia trachomatis*, the bacterium that causes trachoma, from person  
101 to person. *Chlamydia trachomatis* DNA has been found on wild caught *M. sorbens* [3–5], and a  
102 laboratory study demonstrated mechanical transmission of *C. psittaci* between the eyes of Guinea  
103 Pigs by the closely related *Musca domestica* [6]. Strong evidence for the role of *M. sorbens* as  
104 vectors of trachoma comes from a cluster-randomised controlled trial that examined the impact  
105 of fly control interventions on trachoma prevalence [7]. Insecticide spraying significantly reduced  
106 the number of *M. sorbens* flies caught from children’s faces by 88 %, and a 56 % reduction in  
107 trachoma prevalence in children was observed. The provision of pit latrines, which by removing  
108 sources of open defecation controls *M. sorbens* juvenile stages, resulted in a 30 % decrease in flies  
109 on faces and a 30 % reduction in trachoma prevalence (non-significant).

110

111 These findings demonstrate that controlling the population density of *M. sorbens* may contribute  
112 to a decline in trachoma by reducing the number of fly-eye contacts, highlighting the disease-  
113 control potential of effective fly control tools. Odour-baited traps are receiving increased  
114 attention with regards to disease vectors, as the knowledge base around insect olfaction and  
115 attractive volatile chemicals expands [8–12]. Recent studies demonstrating the epidemiological  
116 significance of implementing chemical-based lures for vector-borne disease control [13] bolster  
117 the more widely accepted, and longstanding, tsetse fly example [14].

118

119 Mass deployment of an odour-baited trap for *M. sorbens*, based on the attractive volatiles in  
120 faeces, may suppress populations sufficiently to decrease the prevalence of trachoma.  
121 Alternatively, such traps could be used for entomological surveillance, and for monitoring and  
122 evaluating *M. sorbens* control programmes.

123

124 Female *M. sorbens* deposit their eggs on faeces, in which the larvae develop [15]. Previous studies  
125 have shown that *M. sorbens* preferentially breed in human faeces [2,16], and that flies emerging  
126 from human faeces are on average larger than those emerging from any other types of faeces,  
127 suggesting that human faeces may be an optimal larval development medium [16]. It is unknown,  
128 however, whether more prolific emergence from human faeces is due to better larval survival  
129 within human faeces, or due to more oviposition in human faeces caused by its relatively greater  
130 attraction to female flies. It is common for insects to use semiochemicals, volatile airborne  
131 chemical signals, to locate resources such as oviposition sites and to discriminate between  
132 resources of varying quality. It is therefore plausible that female *M. sorbens* visit human faeces  
133 more frequently relative to the faeces of other animals because of favourable semiochemical  
134 cues.

135

136 The aim of this study was to investigate the attractiveness of faeces from human beings and local  
137 domesticated animals to the Bazaar fly, *M. sorbens*. We conducted studies at two locations in The  
138 Gambia and one in Ethiopia, and sought to identify putative attractants in faecal odours.

139

140

141

## 142 **Methods**

### 143 **Study areas and study periods**

144 The study was carried out in The Gambia and Ethiopia. In The Gambia, there were two sites, the  
145 village of Boiram, Fulado West, Central River Division, The Gambia and the rural town of Farafenni.  
146 Studies were conducted in Boiram during the June-August 2009 rainy season, and in Farafenni in  
147 November/December 2009, immediately after the rainy season. The third site was Bofa Kebele  
148 (Oromia, central Ethiopia), identified as having highly prevalent active trachoma by the Global  
149 Trachoma Mapping Project. Here the study was conducted in February 2017 [17].

150

### 151 **Ethics**

152 The Gambian study was approved by the Joint Gambian Government/Medical Research Council  
153 Laboratories Joint Ethics Committee (protocol number L2010.90, re: L2009.67, 01/12/09), and the  
154 Ethiopian study by the LSHTM ethics committee (reference number 11979/RR/5821) and the  
155 Oromia Regional Health Bureau Ethics Committee. In the Gambian study, written informed  
156 consent was provided by the heads of all compounds in which traps were sited or from which  
157 faeces were collected. In the Ethiopian study, written informed consent was provided by all  
158 participants including guardians of children.

159

## 160 **Trapping**

161 **Trap design** Fly traps were placed on the ground and consisted of a white plastic pot (7.8 cm  
162 high, 8.5 cm bottom diameter (D), 11.5 cm top D, Vegware, Edinburgh, UK) containing 50 g of  
163 faeces, soil, or left empty (Fig 1). Pots were covered by a lid (Gambian study, a disc cut from yellow  
164 sticky trap [Agrisense BCS Ltd, Pontypridd, UK]; Ethiopian study, the commercially available pot  
165 lid [Vegware] with yellow sticky trap stuck on [Agralan, Wiltshire, UK]) with a hole in the centre  
166 (Gambian study, 3.2 cm D, Ethiopian study, 4 cm D), covered on the underside with nylon mesh  
167 (Gambian study, 0.4 mm gauge [Lockertex, Warrington]; Ethiopian study, white polyester mesh,  
168 The Textile House). Traps were replaced daily.

169

170 In The Gambian study, a layer of glue (“Rat Stop”, 92 % polybutene, 8 % hexane) was added to the  
171 top of the yellow disc to increase trap catch. A thin band of “Rat Stop” was also applied to the side  
172 of each pot to prevent ants from gaining access to, and consuming, the trap catches. Wire frames,  
173 38 cm<sup>3</sup>, coated in black electrical tape and with the upper side covered by blue plastic sheeting,  
174 were placed over the pot traps to protect against rain; in the Ethiopian study neither this  
175 protection nor the “Rat Stop” glue was used. A barrier of thorny acacia branches was placed in  
176 front of all traps to stop large animals interfering with them.

177

178 **Fig 1. Bristow odour-baited trap for *Musca sorbens*.** (A) Trap design, (B) typical fly catch on the  
179 yellow sticky discs on the trap.

180



181 **Collection of faeces bait** In the Gambian study, faeces (50 g, calf, cow, dog, donkey, horse,  
182 human and sheep) were collected for trap bait from open defecation in the compounds between  
183 07:00 h and 11:30 h and weighed on a balance (Salter ARC 1066, accurate to  $\pm 1$  g). In Boiram,  
184 human faeces were obtained from two adjacent compounds, the children of which defaecated on  
185 the ground. In Farafenni, human faeces were obtained from a compound with five children  
186 between the ages of eight and 15 years, who defaecated in a plastic potty in the morning. Cow  
187 and calf faeces were collected from areas where cattle were confined at night. Cattle grazed in  
188 the bush, calves were under one-year-old and fed on milk. Dog faeces were unavailable in Boiram.  
189 Donkeys and horses were fed cous (millet), supplemented in the village by grazing. Their faeces  
190 were collected from family compounds. Sheep faeces were collected from shelters where the  
191 animals were kept overnight. Sheep in the village grazed in the bush, whilst those in town  
192 scavenged in the streets. Tobaski, a religious festival during which rams or sheep are slaughtered,  
193 occurred between the first and second experiments. Before Tobaski, sheep had their diets  
194 supplemented with milk, millet porridge or Senegalese feed blocks known as *repas* of unknown  
195 composition. After Tobaski the sheep had a less nutritious diet. Soil samples were taken from  
196 uncontaminated areas close to the trap site and used as control bait. In the Ethiopian study,  
197 human adult and human child, cow and donkey faeces (50 g) were collected from the compounds  
198 where open defecation is commonplace, and weighed (Ascher Portable Digital Scale, accurate to  
199 0.01 g).

200 **Experimental design and data analysis** Traps containing faeces or soil bait were set  
201 daily, 50 cm apart, along a transect. Latin Square (LS) designs were used so that baits were rotated  
202 between trap positions daily, allowing trapsite variation and bait, and preventing baits having an  
203 effect on adjacent traps. In the Gambian study, eight traps were set daily (seven faeces baits and  
204 soil, with an empty pot instead of dog faeces in Boiram) and the eight by eight LS was repeated  
205 twice in each site ( $n=16$  trap days per location). In the Ethiopian study, a transect of five traps  
206 (four faeces and one soil bait) was set on day one outside one household, and thereafter five-trap  
207 transects were deployed outside two (new) households daily until day six, giving a total of 11  
208 trapping days per treatment (trap/bait). The position of the traps within each transect was rotated  
209 according to a LS design. Environmental variables were recorded as follows: Bioram, max/min  
210 ambient temperature, presence/absence of precipitation (thermometers hung nearby and daily  
211 observation of precipitation); Farafenni max/min ambient temperature and humidity (TinytagPlus  
212 datalogger, Gemini dataloggers); Oromia, start/finish ambient temperature, start/finish ambient  
213 humidity (Colemeter thermometer hygrometer humidity meter).

214

215 After 24 h, *M. sorbens* found adhering to the sticky trap lids were identified according to  
216 taxonomic keys [18,19] and counted. In The Gambian study, *M. sorbens* were counted, females  
217 dissected for gravidity and *Musca domestica* were counted. In the Ethiopian study, *M. sorbens*  
218 were counted and sexed. Negative binomial regression, which accounted for the over-dispersed  
219 nature of trap catch data, was used to model the relationship between trap bait and the number  
220 of flies caught. The effect of trap bait on the likelihood that a trapped *M. sorbens* was female was  
221 analysed using logistic regression (analyses performed in Stata [v. 15, StatCorp]).

222

223 **Chemistry of bait attraction**

224 **Collection of volatiles** Air entrainment of faeces samples was performed only during the  
225 Gambian study. Five human faeces samples were collected (50 g) from Farafenni and Boiram into  
226 individual sterile polyethyleneterephthalate (PET) cooking bags (Sainsbury's Ltd, UK). Volatiles  
227 from the faeces were collected using a portable air entrainment kit. The bag containing the sample  
228 was sealed to an aluminium disc with air inlet and outlet holes using bulldog clips. The air  
229 entrainment kit, comprising an inflow and outflow pump and charcoal filters (VWR Chemicals  
230 BDH, 10-14 mesh, 50 g, preconditioned under a stream of nitrogen at 150 °C for a minimum of  
231 two hours), was connected to the bag and air inflow (16 L/min) set higher than outflow (2 x 7  
232 L/min), creating positive pressure to prevent entrance of environmental volatiles. PTFE tubing and  
233 rubber ferrules were used for all connections. The apparatus was cleaned before and after use  
234 with ethanol (100 %, Sigma-Aldrich, Gillingham, UK). Volatiles were collected in the outflow onto  
235 Porapak Q polymer (50 mg, mesh size 50/80, Supelco), contained inside a glass tube and held with  
236 two plugs of sterile silicanised glass wool ('Porapak tubes'). These had been conditioned prior to  
237 use by repeated washing with redistilled diethyl ether and heating to 132 °C for 2 h under a stream  
238 of constant (filtered) nitrogen. After 12 h of volatile collection, Porapak tubes were sealed in  
239 ampoules under filtered nitrogen for transport and storage. Ampoules were initially stored at the  
240 study site at 4 °C (for a maximum of six weeks), then in the UK volatiles were eluted from the  
241 Porapak tubes using freshly-distilled diethyl ether ('extract') and stored in vials at -20 °C until  
242 analysis.

243 **Gas chromatography** Air-entrainment extracts were concentrated (from 750 to 50  $\mu$ L), and  
244 samples (1  $\mu$ L) analysed by gas chromatography (GC). The GC (Agilent 6890N, equipped with a  
245 temperature programmable on-column injector, flame ionization detector [FID] and using  
246 hydrogen as a carrier gas) was fitted with a non-polar HP-1 column (10 m, 0.53 mm internal  
247 diameter (ID), 2.65 $\mu$ m film thickness). The following GC program was used: oven temperature  
248 maintained at 30 °C for 2 min, increased by 10 °C per min to 230 °C, then held at 230 °C for 30  
249 minutes.

250

251 **Fly rearing** After counting and identification, live female *M. sorbens* were collected from the  
252 sticky traps with blunt forceps and placed into Insect Rearing Cages (BugDorm, 47.5 cm<sup>3</sup>)  
253 containing water (soaked blue roll), white sugar cubes and either human faeces (20 g on a small  
254 pot of damp soil) or full fat Ultra-high temperature processing (UHT) milk (soaked into cotton  
255 wool). The latter served as an oviposition medium and protein source respectively [20], and every  
256 third day larvae were transferred onto larval diet medium: molasses sugar (8 g), dried yeast (7 g),  
257 full fat UHT milk (100 mL), water (200 mL) and wheat bran. Cages containing artificial diet were  
258 kept indoors in The Gambia at 25-28 °C and 25-50 % relative humidity (RH), while cages containing  
259 faeces were kept in natural daylight in a ventilated outbuilding, at 17-44 °C and 8-65 % RH, with  
260 a roughly 12:12 light/dark photo-period. Six days after they were placed in the cages, two samples  
261 of artificial larval diet and one sample of faeces were removed from oviposition cages and the soil  
262 carefully scraped away to expose the pupariae. Emerging adults were used for GC-EAG.

263

264 **Coupled gas chromatography-electroantennography (GC-EAG)** Randomly  
265 selected *M. sorbens* females from the laboratory-reared colony were chilled on ice until  
266 movement ceased, the heads severed, and abdomens dissected to determine gravidity. One  
267 antenna was removed to reduce noise in the recording. The tip of the other antenna was cut off  
268 before inserting the antenna into a glass electrode containing a silver/silver chloride wire and  
269 filled with Ringer's solution (7.55 g NaCl, 0.64 g KCl, 0.22 g CaCl<sub>2</sub>, 1.73 g MgCl<sub>2</sub>, 0.86 g Na<sub>2</sub>HCO<sub>3</sub>,  
270 0.61 g Na<sub>3</sub>PO<sub>4</sub>/L distilled water). Another electrode was inserted into the back of the flies' head  
271 to complete the circuit. This assemblage was held in a constant stream (1 L/min) of humidified,  
272 charcoal-filtered air. A sample of the extract (1 µL of a representative 50 µL concentrated 12-h air  
273 entrainment extract) was injected onto a 30 m non-polar polydimethylsiloxane (HP1) column  
274 (internal diameter 0.32 mm, solid phase thickness 0.52 µm) in a gas chromatograph (Hewlett  
275 Packard HP6890 with a cool-on-column injector, hydrogen carrier gas and flame ionisation  
276 detector). The following GC program was used: oven temperature maintained at 40 °C for 2 min,  
277 increased by 5 °C per min to 100 °C, then raised by 10 °C per min to 250 °C. Emerging compounds  
278 were delivered simultaneously to the flame ionisation detector and the airstream blowing over  
279 the antenna. The signal was amplified 10,000 times by the Intelligent Data Acquisition Controller-  
280 4, and signals were analysed by using EAD 2000 software (both Syntech, The Netherlands).  
281 Antennal responses were correlated visually to compound peaks by overlaying traces on a light  
282 box, and the procedure repeated for four female flies.  
283

284 **Coupled gas chromatography-mass spectrometry (GC-MS)** Compounds found to  
285 be electrophysiologically-active were identified by GC-MS only. One concentrated extract was  
286 diluted tenfold prior to injecting (1 µL) onto a HP1 column (dimensions as for GC-EAG; Hewlett HP  
287 5890 GC fitted with a cool-on-column injector, helium carrier gas and FID, with a deactivated HP1  
288 pre-column [0.53 mm ID]). The following program was used: oven temperature maintained at 30  
289 °C for 5 min, increased by 5 °C per min to 250 °C. A VG Autospec double-focusing magnetic sector  
290 mass spectrometer (MS) using electron impact ionisation (70 eV, 250 °C) was coupled to the GC  
291 and data analysed using an integrated data system (Fisons Instruments, Manchester, UK).  
292 Compounds were identified using the NIST 2005 database of standards (NIST/EPA/NIH mass  
293 spectral library version 2.0, Office of the Standard Reference Data Base, National Institute of  
294 Standards and Technology, Gaithersburg, Maryland).

295

## 296 **Results**

### 297 **Trapping**

298 A total of 1734 muscid flies were caught in Boiram across all traps between 17<sup>th</sup> July 2009 and 7<sup>th</sup>  
299 August 2009. Of these, 382 were *M. sorbens*, (82.9 % female), 1046 *M. domestica* (69.7 % female)  
300 and 306 unidentified *Musca* spp. (80.3 % female). A total of 1899 flies were caught in Farafenni  
301 between 18<sup>th</sup> November 2009 and 10<sup>th</sup> December 2009, of which 1754 were *M. sorbens*, (96.5 %  
302 female) and 145 *M. domestica* (86.2 % female). Aside from horse or sheep faeces, for all other  
303 faeces baits more than 60 % of flies collected were gravid. A total of 152 *M. sorbens* were caught  
304 between 19<sup>th</sup> and 27<sup>th</sup> February 2017 in Oromia, of those that could be sexed (96.1 %), most were  
305 female (90.4 %). Gravidity was not measured, and other flies/arthropods not counted. The  
306 distribution of *M. sorbens* trap catches per night by bait type are shown in Fig 2, S1-S2 Tables.

307

308 **Fig 2. Male and female *Musca sorbens* caught by different faeces bait, in the three studies**

309 (boxes, median and interquartile range; points, outliers).

310

311 In all three studies, there was an association between the type of trap bait and the number of  
312 female *M. sorbens* caught ( $P < 0.001$ , Table 1). Human faeces were found to be the most attractive  
313 bait to female *M. sorbens*, although, when using soil bait as the baseline, the estimated rate ratios  
314 varied substantially between studies. In Boiram the mean rate ratio (RR) was 44.4 (95 %  
315 confidence intervals [CI] 15.5-127.3,  $P < 0.001$ ), in Farafenni 61.4 (95 % CI 32.3-117.0,  $P < 0.001$ ) and  
316 in Oromia 10.5 (95 % CI 2.5-43.5,  $P = 0.001$ ) in traps baited with adult faeces and 8.2 (95 % CI 2.0-  
317 34.0,  $P = 0.004$ ) when child faeces were used (Table 1).

318

319 For non-human faeces baits, in Farafenni, dog, horse and sheep faeces caught more female *M.*  
320 *sorbens* than soil-baited traps (dog, RR 20.7, 95 % CI 10.8-39.6,  $P < 0.001$ ; horse, RR 3.7, 95 % CI  
321 1.9-7.3,  $P < 0.001$ ; sheep, RR 2.5, 95 % CI 1.2-5.1,  $P = 0.012$  Table 1). In Boiram, traps baited with  
322 horse, sheep and calf faeces were more attractive than soil-baited traps (RR 3.2, 95 % CI 1.0-10.2,  
323  $P = 0.048$ ; RR 5.2, 95 % CI 1.7-15.8,  $P = 0.004$ ; RR 4.6, 95 % CI 1.5-14.1,  $P = 0.008$  respectively, Table  
324 1). Dog faeces were not tested in Boiram or Oromia. In Oromia no evidence was found of a  
325 difference in rates between the non-human faeces baits (cow or donkey) and the soil bait.

326

327 **Table 1. *Musca sorbens* caught by different baits in three study sites**

|                  |                                      | Female <i>Musca sorbens</i> |                      |                      | Male <i>Musca sorbens</i> |                      |                      |
|------------------|--------------------------------------|-----------------------------|----------------------|----------------------|---------------------------|----------------------|----------------------|
| <b>BOIRAM</b>    |                                      | Rate ratio (95 % CI)        | P-value <sup>A</sup> | P-value <sup>B</sup> | Rate ratio (95 % CI)      | P-value <sup>A</sup> | P-value <sup>B</sup> |
| Bait             | Calf faeces                          | 4.60 (1.50-14.12)           | 0.008                |                      | 0.80 (0.61-4.13)          | 0.790                |                      |
|                  | Cow faeces                           | 2.20 (0.66-7.31)            | 0.198                |                      | 1.00 (0.21-4.86)          | 1.000                |                      |
|                  | Donkey faeces                        | 1.40 (0.39-5.04)            | 0.607                |                      | <sup>c</sup>              |                      |                      |
|                  | Empty pot                            | 1.40 (0.39-5.04)            | 0.607                | <0.001               | 1.20 (0.26-5.60)          | 0.817                | 0.086                |
|                  | Horse faeces                         | 3.20 (1.01-10.15)           | 0.048                |                      | 1.80 (0.41-7.82)          | 0.433                |                      |
|                  | Human faeces                         | 44.40 (15.49-127.30)        | <0.001               |                      | 5.60 (1.43-21.96)         | 0.014                |                      |
|                  | Sheep faeces                         | 5.20 (1.71-15.83)           | 0.004                |                      | 1.60 (0.36-7.08)          | 0.536                |                      |
|                  | Soil                                 | 1.0                         |                      |                      | 1.0                       |                      |                      |
| Climate          | Av. temp <sup>D,E</sup> , continuous | 1.15 (0.92-1.45)            |                      | 0.225                | 1.45 (1.08-1.94)          |                      | 0.014                |
|                  | Rainfall <sup>F,E</sup> , Yes        | 1.21 (0.40-3.62)            |                      | 0.737                | 0.82 (0.21-3.21)          |                      | 0.779                |
| <b>FARAFENNI</b> |                                      |                             |                      |                      |                           |                      |                      |
| Bait             | Calf faeces                          | 2.00 (0.97-4.11)            | 0.059                |                      | 0.33 (0.06-1.78)          | 0.198                |                      |
|                  | Cow faeces                           | 1.70 (0.83-3.58)            | 0.145                |                      | 0.50 (0.12-2.17)          | 0.355                |                      |
|                  | Dog faeces                           | 20.70 (10.80-39.57)         | <0.001               |                      | 1.17 (0.35-3.85)          | 0.800                |                      |
|                  | Donkey faeces                        | 1.20 (0.57-2.63)            | 0.607                | <0.001               | 0.83 (0.23-3.00)          | 0.781                | <0.001               |
|                  | Horse faeces                         | 3.70 (1.85-7.28)            | <0.001               |                      | 1.17 (0.02-1.46)          | 0.106                |                      |
|                  | Human faeces                         | 61.40 (32.26-117.02)        | <0.001               |                      | 5.33 (1.97-14.47)         | 0.001                |                      |
|                  | Sheep faeces                         | 2.50 (1.22-5.08)            | 0.012                |                      | 0.89 (0.25-3.21)          | 0.857                |                      |
|                  | Soil                                 | 1.0                         |                      |                      | 1.0                       |                      |                      |
| Climate          | Av. temp <sup>G</sup> , continuous   | 1.11 (0.96-1.27)            |                      | 0.150                | 1.26 (1.05-1.52)          |                      | 0.015                |
|                  | Av. RH <sup>F</sup> , Yes            | 1.02 (0.98-1.06)            |                      | 0.294                | 1.02 (0.97-1.07)          |                      | 0.412                |
| <b>OROMIA</b>    |                                      |                             |                      |                      |                           |                      |                      |
| Bait             | Cow faeces                           | 1.33 (0.20-6.35)            | 0.718                |                      | 0.17 (0.02-1.42)          | 0.102                |                      |
|                  | Donkey faeces                        | 1.00 (0.21-5.01)            | 1.000                |                      | 0.33 (0.06-1.71)          | 0.189                |                      |
|                  | Adult human faeces                   | 10.50 (2.54-43.48)          | 0.001                |                      | 0.50 (0.12-2.09)          | 0.342                |                      |
|                  | Child faeces                         | 8.17 (1.96-34.03)           | 0.004                | <0.001               | 0.33 (0.06-1.71)          | 0.189                | 0.359                |
|                  | Soil                                 | 1.0                         |                      |                      | 1.0                       |                      |                      |
| Climate          | Av. temp <sup>G</sup> , continuous   | 0.89 (0.70-1.14)            |                      | 0.366                | 1.48 (1.08-2.04)          |                      | 0.015                |
|                  | Av. RH <sup>F</sup> , Yes            | 1.01 (0.96-1.07)            |                      | 0.721                | 1.09 (1.02-1.16)          |                      | 0.007                |

328 <sup>A</sup> P-value comparing this category with baseline (soil)

329 <sup>B</sup> P-value testing hypothesis that bait is associated with number of flies trapped

330 <sup>C</sup> Value could not be estimated as no male *Musca sorbens* caught in traps baited with donkey faeces

331 <sup>D</sup> Adjusted for rainfall

332 <sup>E</sup> Based on 13 days data (two days missing)

333 <sup>F</sup> Adjusted for average temperature

334 <sup>G</sup> Adjusted for average RH

335

336 Further to being more attractive than the soil bait, human faeces were found to be more attractive

337 than the second most attractive bait at each site ( $P < 0.001$ ). In Boiram, human faeces-baited traps

338 caught 8.5 times as many female *M. sorbens* (95 % CI 4.2-17.2) than sheep faeces-baited traps. In

339 Farafenni, the rate ratio was 3.0 (95 % CI 1.9-4.7) compared to dog faeces-baited traps, and in



340 Oromia, RR 7.9 (2.0-30.8) and RR 6.1 (1.6-24.1) in human and child faeces-baited traps  
341 respectively, compared to cow faeces-baited traps.

342

343 In all studies, there were increased odds that *M. sorbens* caught by human faeces bait relative to  
344 those caught in the soil control would be female (Boiram, odds ratio [OR] 7.93 [95 % CI 2.16-29.1)  
345  $P=0.002$ ; Farafenni, OR 11.52 [95 % CI 4.29-30.96)  $P<0.001$ ; Oromia adult, OR 14 [95 % CI 3.63-  
346 53.99)  $P<0.001$ ; Oromia child, OR 32.67 [95 % CI 5.59-191.06)  $P<0.001$ ; S3 Table). Similarly,  
347 increased odds for female *M. sorbens* being caught were observed for dog and horse faeces baits  
348 in Farafenni, and cow faeces bait in Oromia (S3 Table).

349

### 350 **Coupled gas chromatography-electroantennography**

351 Twelve compounds from the headspace of the human faecal sample elicited an antennal response  
352 from two or more *M. sorbens* females. The compounds were subsequently identified by GC-MS  
353 as 3-ethylpentane, 2-methylpropanoic acid, butanoic acid, pentanoic acid, hexanoic acid, cresol,  
354 2-phenylethanol, valerolactam, dimethyl tetrasulphide, indole, 2-dodecanone and an unidentified  
355 cholesterol derivative (Table 2).

356

357

358

359

360

361

362 **Table 2. Tentative identification of compounds eliciting electrophysiological responses in *Musca***

363 ***sorbens* females**

| Peak number | Compound identified    |
|-------------|------------------------|
| 1           | 3-Ethylpentane         |
| 2           | 2-Methylpropanoic acid |
| 3           | Butanoic acid          |
| 4           | Pentanoic acid         |
| 5           | Hexanoic acid          |
| 6           | Isomer of cresol       |
| 7           | 2-Phenylethanol        |
| 8           | Valerolactam           |
| 9           | Dimethyl tetrasulphide |
| 10          | Indole                 |
| 11          | 2-Dodecanone           |
| 12          | Cholesterol derivative |

364

## 365 **Discussion**

366 We found evidence that *M. sorbens*, the putative vector of trachoma, is strongly attracted to  
367 odours produced by human faeces, which attracted and caught the greatest number of *M. sorbens*  
368 in all three studies. This was particularly so with female *M. sorbens* relative to males. In the  
369 Gambian study, the majority of females were found to be gravid. These findings confirm that  
370 female *M. sorbens* are attracted to faeces for oviposition, as is widely accepted [2,15,21], and  
371 further demonstrate that volatile cues alone are responsible for this attraction as the faeces baits  
372 could only have been visible to flies if they were very close, directly above, and could see down  
373 through the mesh. A previous study conducted in The Gambia [16] demonstrated attraction to  
374 human faeces, but because the faeces were not hidden from the flies, visual cues could not be  
375 ruled out as a stimulus. In the current study, there was also evidence that some of the non-human  
376 faeces baits were relatively more attractive than others (e.g. calf and sheep in Boiram attracted  
377 more female *M. sorbens* than the soil control, as did dog and horse in Farafenni). The high rate  
378 ratio for female *M. sorbens* caught using dog faeces in Farafenni (the only site with dogs) may

379 indicate a preference for non-herbivore faeces. The mean rate ratio of *M. sorbens* females caught  
380 using human faeces relative to the soil control varied between the three sites, but in all cases a  
381 large effect was seen. The Gambian studies were conducted in two different ecological settings  
382 and at different times of the year, making it impossible to account for the differences in fly  
383 abundance between sites. At the Oromia site, trap catch may have been removed by birds or  
384 other insectivores as no protective wire frames were used. Even more so, the environment,  
385 including local abiotic and biotic factors, and *M. sorbens* population in Ethiopia is likely to be so  
386 different to that in The Gambia that comparison of population density between studies and based  
387 on a small sampling window would not be appropriate.

388

389 Differential attraction to different types of faeces could be due to the presence or absence of  
390 certain semiochemicals that attract or repel the flies. Of the *M. sorbens* EAG-active compounds  
391 tentatively identified here, short chain fatty acids (SCFA, including 2-methyl propanoic acid,  
392 butanoic acid, pentanoic acid and hexanoic acid), indoles, cresols and sulphur compounds are  
393 known volatile organic compounds in faeces [22–25]. SCFA are produced in the gut by bacterial  
394 fermentation of carbohydrates and proteins [26], and are commonly found in vertebrate  
395 associated volatiles including urine and faeces [22,27–30]. Their detection by host-seeking  
396 arthropods is well documented [31–35]. The aromatic compounds identified (cresol, 2-  
397 phenylethanol, indole) are likely to be fermentation products of the aromatic amino acids  
398 tyrosine, phenylalanine and tryptophan [24].

399

400 Several of these faeces-associated volatiles have been described in similar entomological studies.  
401 Antennal response by *M. domestica* (GC-EAG) detected nine compounds in pig faeces volatiles,

402 with butanoic acid and indole eliciting strong responses in subsequent dose-response EAG [36].  
403 Both *m*- and *p*-cresol in the headspace of canine faeces elicited antennal response in the common  
404 green bottle fly, *Lucilia sericata*, and a chemical blend including these compounds was as  
405 attractive to flies as the faeces [37]. Cresols (isomer not identified) in the volatiles from rat carrion  
406 also elicited antennal response from *L. sericata* [38], and female and male *M. domestica*  
407 responded (by EAG) to volatiles including butanoic acid, hexanoic acid, 2-phenylethanol and *p*-  
408 cresol in the headspace of vinegar [39]. Similarly, butanoic acid and *p*-cresol were among  
409 chemostimulants of *Stomoxys calcitrans* detected in the headspace of rumen volatiles, these were  
410 also found to elicit activation and attraction in a wind tunnel [40]. Microbial degradation is  
411 thought to lead to the production of *m*- and *p*-cresol in cattle urine, again found to elicit an EAG  
412 response in *S. calcitrans* [41]. *Stomoxys calcitrans* is a muscid fly with coprophagous larvae, known  
413 to be attracted to faecal odours. This fly has been shown to select faeces by their odour [42], as  
414 demonstrated here with *M. sorbens*, and the chemostimulant compounds thought to be  
415 responsible for that attraction included butanoic acid, indoles, *p*-cresol and sulphides.

416

417 Taken together, the faecal semiochemicals described here are commonly isolated and/or  
418 detected as they are products of bacterial decomposition, and as such are frequently detected by  
419 filth flies, most likely as cues for oviposition sites. To underpin the specific attractiveness of human  
420 faeces to *M. sorbens* therefore, variation in amounts emitted, or ratios of compounds present,  
421 must distinguish this oviposition medium.

422

## 423 **Conclusion**

424 Our study demonstrates that female *M. sorbens* at three different study locations, in both West  
425 Africa and East Africa, are preferentially attracted to the volatiles of human faeces, as evidenced  
426 by attraction in the absence of visual cues. We provide evidence that twelve compounds are  
427 putative attractants that may play a role in this response, by identifying, for the first time,  
428 compounds including short chain fatty acids and aromatic compounds that are detected by the  
429 antennae of *M. sorbens*. Further work is required to optimise chemical blends and release rates,  
430 to produce a synthetic lure to which the behavioural responses of *M. sorbens* can be investigated.  
431 Establishing those with attractive properties may lead to the design of baits for odour-baited  
432 traps, which could be used for *M. sorbens* surveillance or even population suppression or control.

433

## 434 **Acknowledgements**

435 The authors thank all of the families and communities at the study sites for allowing us to conduct  
436 this work around their homes. We are particularly grateful for the contributions of the MRC  
437 Gambia fieldworkers Pateh Makalo, Kemo Ceesay and Dembo Camara, without whose hard work,  
438 dedication and ingenuity this study would not have been possible, and for the assistance of Keol  
439 Debele, the entomology fieldworker in Oromia. We are also grateful for the assistance from Aida  
440 Abashawl in project co-ordination, Nazif Jemal in communications, and Munira Haji Mohammed  
441 Yusuf, Helen W/Semayat, and Demitu Legesse in translation in the Oromian work.

442

443 **Author contributions**

444 **Conceptualization:** RB, JAP, SD, VCH, SWL, JGL

445 **Data Curation:** JB

446 **Formal Analysis:** AR, DM, JB

447 **Funding Acquisition:** SWL, JGL, MJB, AL, VS

448 **Investigation:** JB, PM, MVH, JCC, JAP, CW

449 **Methodology:** JB, SWL, JGL

450 **Project Administration:** JB, MVH, WA, VCH, SD, AL, VS

451 **Resources:** WA, MAB, UDA, VS

452 **Supervision:** MAB, JCC, JAP, SD, VCH, UDA, SWL, JGL, AL, MJB

453 **Visualization:** JB, AR, DM

454 **Writing - Original Draft Preparation:** AR, JB, JGL

455 **Writing - Review & Editing:** AR, JB, MVH, PM, WA, RB, DM, MB, JCC, VS, JAP, SD, VCH, CW, UDA,

456 MJB, AL, SWL, JGL

457

458

## 459 References

460

- 461 1. Emerson PM, Lindsay SW, Alexander N, Bah M, Dibba S-M, Faal HB, et al. Role of  
462 flies and provision of latrines in trachoma control: cluster-randomised controlled  
463 trial. *Lancet*. 2004;363: 1093–8. doi:10.1016/S0140-6736(04)15891-1
- 464 2. Hafez M, Attia MA. Studies on the ecology of *Musca sorbens* Wied. in Egypt. *Bull la*  
465 *Société Entomol d’Egypte*. 1958; 83–121.
- 466 3. Emerson PM, Bailey RL, Mahdi OS, Walraven GE, Lindsay SW. Transmission ecology  
467 of the fly *Musca sorbens*, a putative vector of trachoma. *Trans R Soc Trop Med Hyg*.  
468 2000;94: 28–32.
- 469 4. Miller K, Pakpour N, Yi E, Melese M, Alemayehu W, Bird M, et al. Pesky trachoma  
470 suspect finally caught. *Br J Ophthalmol*. 2004;88: 750–1.  
471 doi:10.1136/bjo.2003.038661
- 472 5. Lee S, Alemayehu W, Melese M, Lakew T, Lee D, Yi E, et al. Chlamydia on children  
473 and flies after mass antibiotic treatment for trachoma. *Am J Trop Med Hyg*.  
474 2007;76: 129–31.
- 475 6. Forsey T, Darougar S. Transmission of Chlamydiae by the housefly. *Br J Ophthalmol*.  
476 1981;65: 147–150. doi:10.1136/bjo.65.2.147
- 477 7. Emerson PM, Lindsay SW, Alexander N, Bah M, Dibba SM, Faal HB, et al. Role of  
478 flies and provision of latrines in trachoma control: cluster-randomised controlled  
479 trial. *Lancet*. 2004;363: 1093–1098.
- 480 8. Nyasembe VO, Tchouassi DP, Kirwa HK, Foster WA, Teal PEA, Borgemeister C, et al.  
481 Development and assessment of plant-based synthetic odor baits for surveillance  
482 and control of malaria vectors. *PLoS One*. 2014;9: e89818.  
483 doi:10.1371/journal.pone.0089818
- 484 9. Tang R, Zhang F, Kone N, Chen JH, Zhu F, Han RC, et al. Identification and testing of  
485 oviposition attractant chemical compounds for *Musca domestica*. *Sci Rep*. 2016;6.  
486 doi:10.1038/srep33017
- 487 10. Wondwosen B, Birgersson G, Seyoum E, Tekie H, Torto B, Fillinger U, et al. Rice  
488 volatiles lure gravid malaria mosquitoes, *Anopheles arabiensis*. *Sci Rep*. 2016;6:  
489 37930. doi:10.1038/srep37930
- 490 11. Wondwosen B, Hill SR, Birgersson G, Seyoum E, Tekie H, Ignell R. A(maize)ing  
491 attraction: gravid *Anopheles arabiensis* are attracted and oviposit in response to  
492 maize pollen odours. *Malar J*. 2017;16: 39. doi:10.1186/s12936-016-1656-0
- 493 12. Scott-Fiorenzano JM, Fulcher AP, Seeger KE, Allan SA, Kline DL, Koehler PG, et al.  
494 Evaluations of dual attractant toxic sugar baits for surveillance and control of *Aedes*

- 495        *aegypti* and *Aedes albopictus* in Florida. *Parasit Vectors*. 2017;10: 9.  
496        doi:10.1186/s13071-016-1937-z
- 497    13. Homan T, Hiscox A, Mweresa CK, Masiga D, Mukabana WR, Oria P, et al. The effect  
498        of mass mosquito trapping on malaria transmission and disease burden (SolarMal):  
499        a stepped-wedge cluster-randomised trial. *Lancet*. 2016;388: 207–211.  
500        doi:10.1016/S0140-6736(16)30445-7
- 501    14. Vale GA, Hall DR. The use of 1-octen-3-ol, acetone and carbon dioxide to improve  
502        baits for tsetse flies, *Glossina* spp. (Diptera: Glossinidae). *Bull Entomol Res*.  
503        1985;75: 219. doi:10.1017/S0007485300014309
- 504    15. Skidmore P. The biology of the Muscidae of the world. Spencer KA, editor.  
505        Dordrecht: Dr W. Junk Publishers; 1985.
- 506    16. Emerson PM, Bailey RL, Walraven GEL, Lindsay SW. Human and other faeces as  
507        breeding media of the trachoma vector *Musca sorbens*. *Med Vet Entomol*. 2001;15:  
508        314–320.
- 509    17. Burton MJ. Stronger SAFE [Internet]. 2017 [cited 26 Nov 2018]. Available:  
510        <https://www.lshtm.ac.uk/research/centres-projects-groups/stronger-safe>
- 511    18. Crosskey RW, Lane RP. Houseflies, blowflies and their allies (calyprate Diptera). In:  
512        Lane RS, Crosskey RW, editors. *Medical Insects and Arachnids*. 1st ed. London:  
513        Chapman and Hall; 1993. pp. 403–428.
- 514    19. Pont AC. A review of the Fanniidae and Muscidae (Diptera) of the Arabian  
515        Peninsula. Buttiker WKF, editor. *Fauna of Saudi Arabia*, vol. 12. Basle Switzerland:  
516        Pro Entomologica, Naturhistorisches Museum; 1991.
- 517    20. Hafez M, Attia M a. Rearing and Culturing *Musca sorbens* Wied. in the Laboratory.  
518        *Bull Entomol Res*. 1958;49: 633. doi:10.1017/S0007485300053918
- 519    21. Greenberg B. Flies and disease Vol 1: Ecology, classification and biotic associations.  
520        Greenberg, editor. *Flies and disease volume 1: Ecology, classification and biotic*  
521        *associations*. Princeton University Press, New Jersey; 1971.
- 522    22. de Lacy Costello B, Amann A, Al-Kateb H, Flynn C, Filipiak W, Khalid T, et al. A review  
523        of the volatiles from the healthy human body. *J Breath Res*. 2014;8: 014001.  
524        doi:10.1088/1752-7155/8/1/014001
- 525    23. Sato H, Morimatsu H, Kimura T, Moriyama Y, Yamashita T, Nakashima Y. Analysis  
526        of malodorous substances of human feces. *J Heal Sci*. 2002;48: 179–185.
- 527    24. Smith EA, Macfarlane GT. Enumeration of human colonic bacteria producing  
528        phenolic and indolic compounds: Effects of pH, carbohydrate availability and  
529        retention time on dissimilatory aromatic amino acid metabolism. *J Appl Bacteriol*.  
530        1996;81: 288–302.
- 531    25. Yokoyama MT, Carlson JR. Microbial metabolites of tryptophan in the intestinal



- 532 tract with special reference to skatole. *Am J Clin Nutr.* 1979;32: 173–178.  
533 doi:10.1093/ajcn/32.1.173
- 534 26. Garner CE, Smith S, Costello BD, White P, Spencer R, Probert CSJ, et al. Volatile  
535 organic compounds from feces and their potential for diagnosis of gastrointestinal  
536 disease. *Faseb J.* 2007;21: 1675–1688. doi:10.1096/fj.06-6927com
- 537 27. Steullet P, Guerin PM. Identification of vertebrate volatiles stimulating olfactory  
538 receptors on tarsus I of the tick *Amblyomma variegatum Fabricius* (Ixodidae). I.  
539 Receptors within the Haller’s organ capsule. *J Comp Physiol A.* 1994;174: 27–38.
- 540 28. Bosch OJ, Geier M, Boeckh J. Contribution of Fatty Acids to Olfactory Host Finding  
541 of Female *Aedes aegypti*. *Chem Senses.* 2000;25: 323–330.  
542 doi:10.1093/oxfordjournals.chemse.a014042
- 543 29. Pandey SK, Kim K-H. Human body-odor components and their determination. *TrAC*  
544 *Trends Anal Chem.* 2011;30: 784–796. doi:10.1016/j.trac.2010.12.005
- 545 30. Dormont L, Bessière J-M, Cohuet A. Human skin volatiles: a review. *J Chem Ecol.*  
546 2013;39: 569–78. doi:10.1007/s10886-013-0286-z
- 547 31. Healy TP, Copland MJW. Human sweat and 2-oxopentanoic acid elicit a landing  
548 response from *Anopheles gambiae*. *Med Vet Entomol.* 2000;14: 195–200.  
549 doi:10.1046/j.1365-2915.2000.00238.x
- 550 32. Guerenstein PG, Guerin PM. Olfactory and behavioural responses of the blood-  
551 sucking bug *Triatoma infestans* to odours of vertebrate hosts. *J Exp Biol.* 2001;204:  
552 585–97.
- 553 33. Syed Z, Leal WS. Acute olfactory response of *Culex* mosquitoes to a human- and  
554 bird-derived attractant. *Proc Natl Acad Sci U S A.* 2009;106: 18803–8.  
555 doi:10.1073/pnas.0906932106
- 556 34. Smallegange RC, Qiu YT, Bukovinszkiné-Kiss G, Van Loon JJA, Takken W. The effect  
557 of aliphatic carboxylic acids on olfaction-based host-seeking of the malaria  
558 mosquito *Anopheles gambiae sensu stricto*. *J Chem Ecol.* 2009;35: 933–43.  
559 doi:10.1007/s10886-009-9668-7
- 560 35. Young RM, Burkett-Cadena ND, McGaha TW, Rodriguez-Perez MA, Toé LD, Adeleke  
561 MA, et al. Identification of Human Semiochemicals Attractive to the Major Vectors  
562 of Onchocerciasis. *PLoS Negl Trop Dis.* 2015;9: e3450.  
563 doi:10.1371/journal.pntd.0003450
- 564 36. Cosse AA, Baker TC. House Flies and Pig Manure Volatiles: Wind Tunnel Behavioral  
565 Studies and Electrophysiological Evaluations. *J Agric Entomol.* 1996;13(4): 301–  
566 317.
- 567 37. Brodie BS, Babcock T, Gries R, Benn A, Gries G. Acquired Smell? Mature Females of  
568 the Common Green Bottle Fly Shift Semiochemical Preferences from Feces Feeding

- 569 Sites to Carrion Oviposition Sites. *J Chem Ecol.* 2016;42: 40–50.  
570 doi:10.1007/s10886-015-0658-7
- 571 38. Brodie B, Gries R, Martins A, VanLaerhoven S, Gries G. Bimodal cue complex  
572 signifies suitable oviposition sites to gravid females of the common green bottle  
573 fly. *Entomol Exp Appl.* 2014;153: 114–127. doi:10.1111/eea.12238
- 574 39. Qian K, Zhu JJ, Sims SR, Taylor DB, Zeng X. Identification of Volatile Compounds  
575 From a Food-Grade Vinegar Attractive to House Flies (Diptera: Muscidae). *J Econ*  
576 *Entomol.* 2013;106: 979–987. doi:10.1603/EC12424
- 577 40. Jeanbourquin P, Guerin PM. Sensory and behavioural responses of the stable fly  
578 *Stomoxys calcitrans* to rumen volatiles. *Med Vet Entomol.* 2007;21: 217–224.  
579 doi:10.1111/j.1365-2915.2007.00686.x
- 580 41. Birkett MA, Agelopoulos N, Jensen KM V, Jespersen JB, Pickett JA, Prijs HJ, et al. The  
581 role of volatile semiochemicals in mediating host location and selection by  
582 nuisance and disease-transmitting cattle flies. *Med Vet Entomol.* 2004;18: 313–  
583 322. doi:10.1111/j.0269-283X.2004.00528.x
- 584 42. Jeanbourquin P, Guerin PM. Chemostimuli implicated in selection of oviposition  
585 substrates by the stable fly *Stomoxys calcitrans*. *Med Vet Entomol.* 2007;21: 209–  
586 216. doi:10.1111/j.1365-2915.2007.00685.x  
587  
588

## 589 **Supporting Information**

590 **S1 Table. Median female *Musca sorbens*/trap/night (IQR)**

591 **S2 Table. Median male *Musca sorbens*/trap/night (IQR)**

592 **S3 Table. Odds of *Musca sorbens* caught by different bait types being female**

593 **S4 dataset. *Musca sorbens* trapping dataset (raw)**

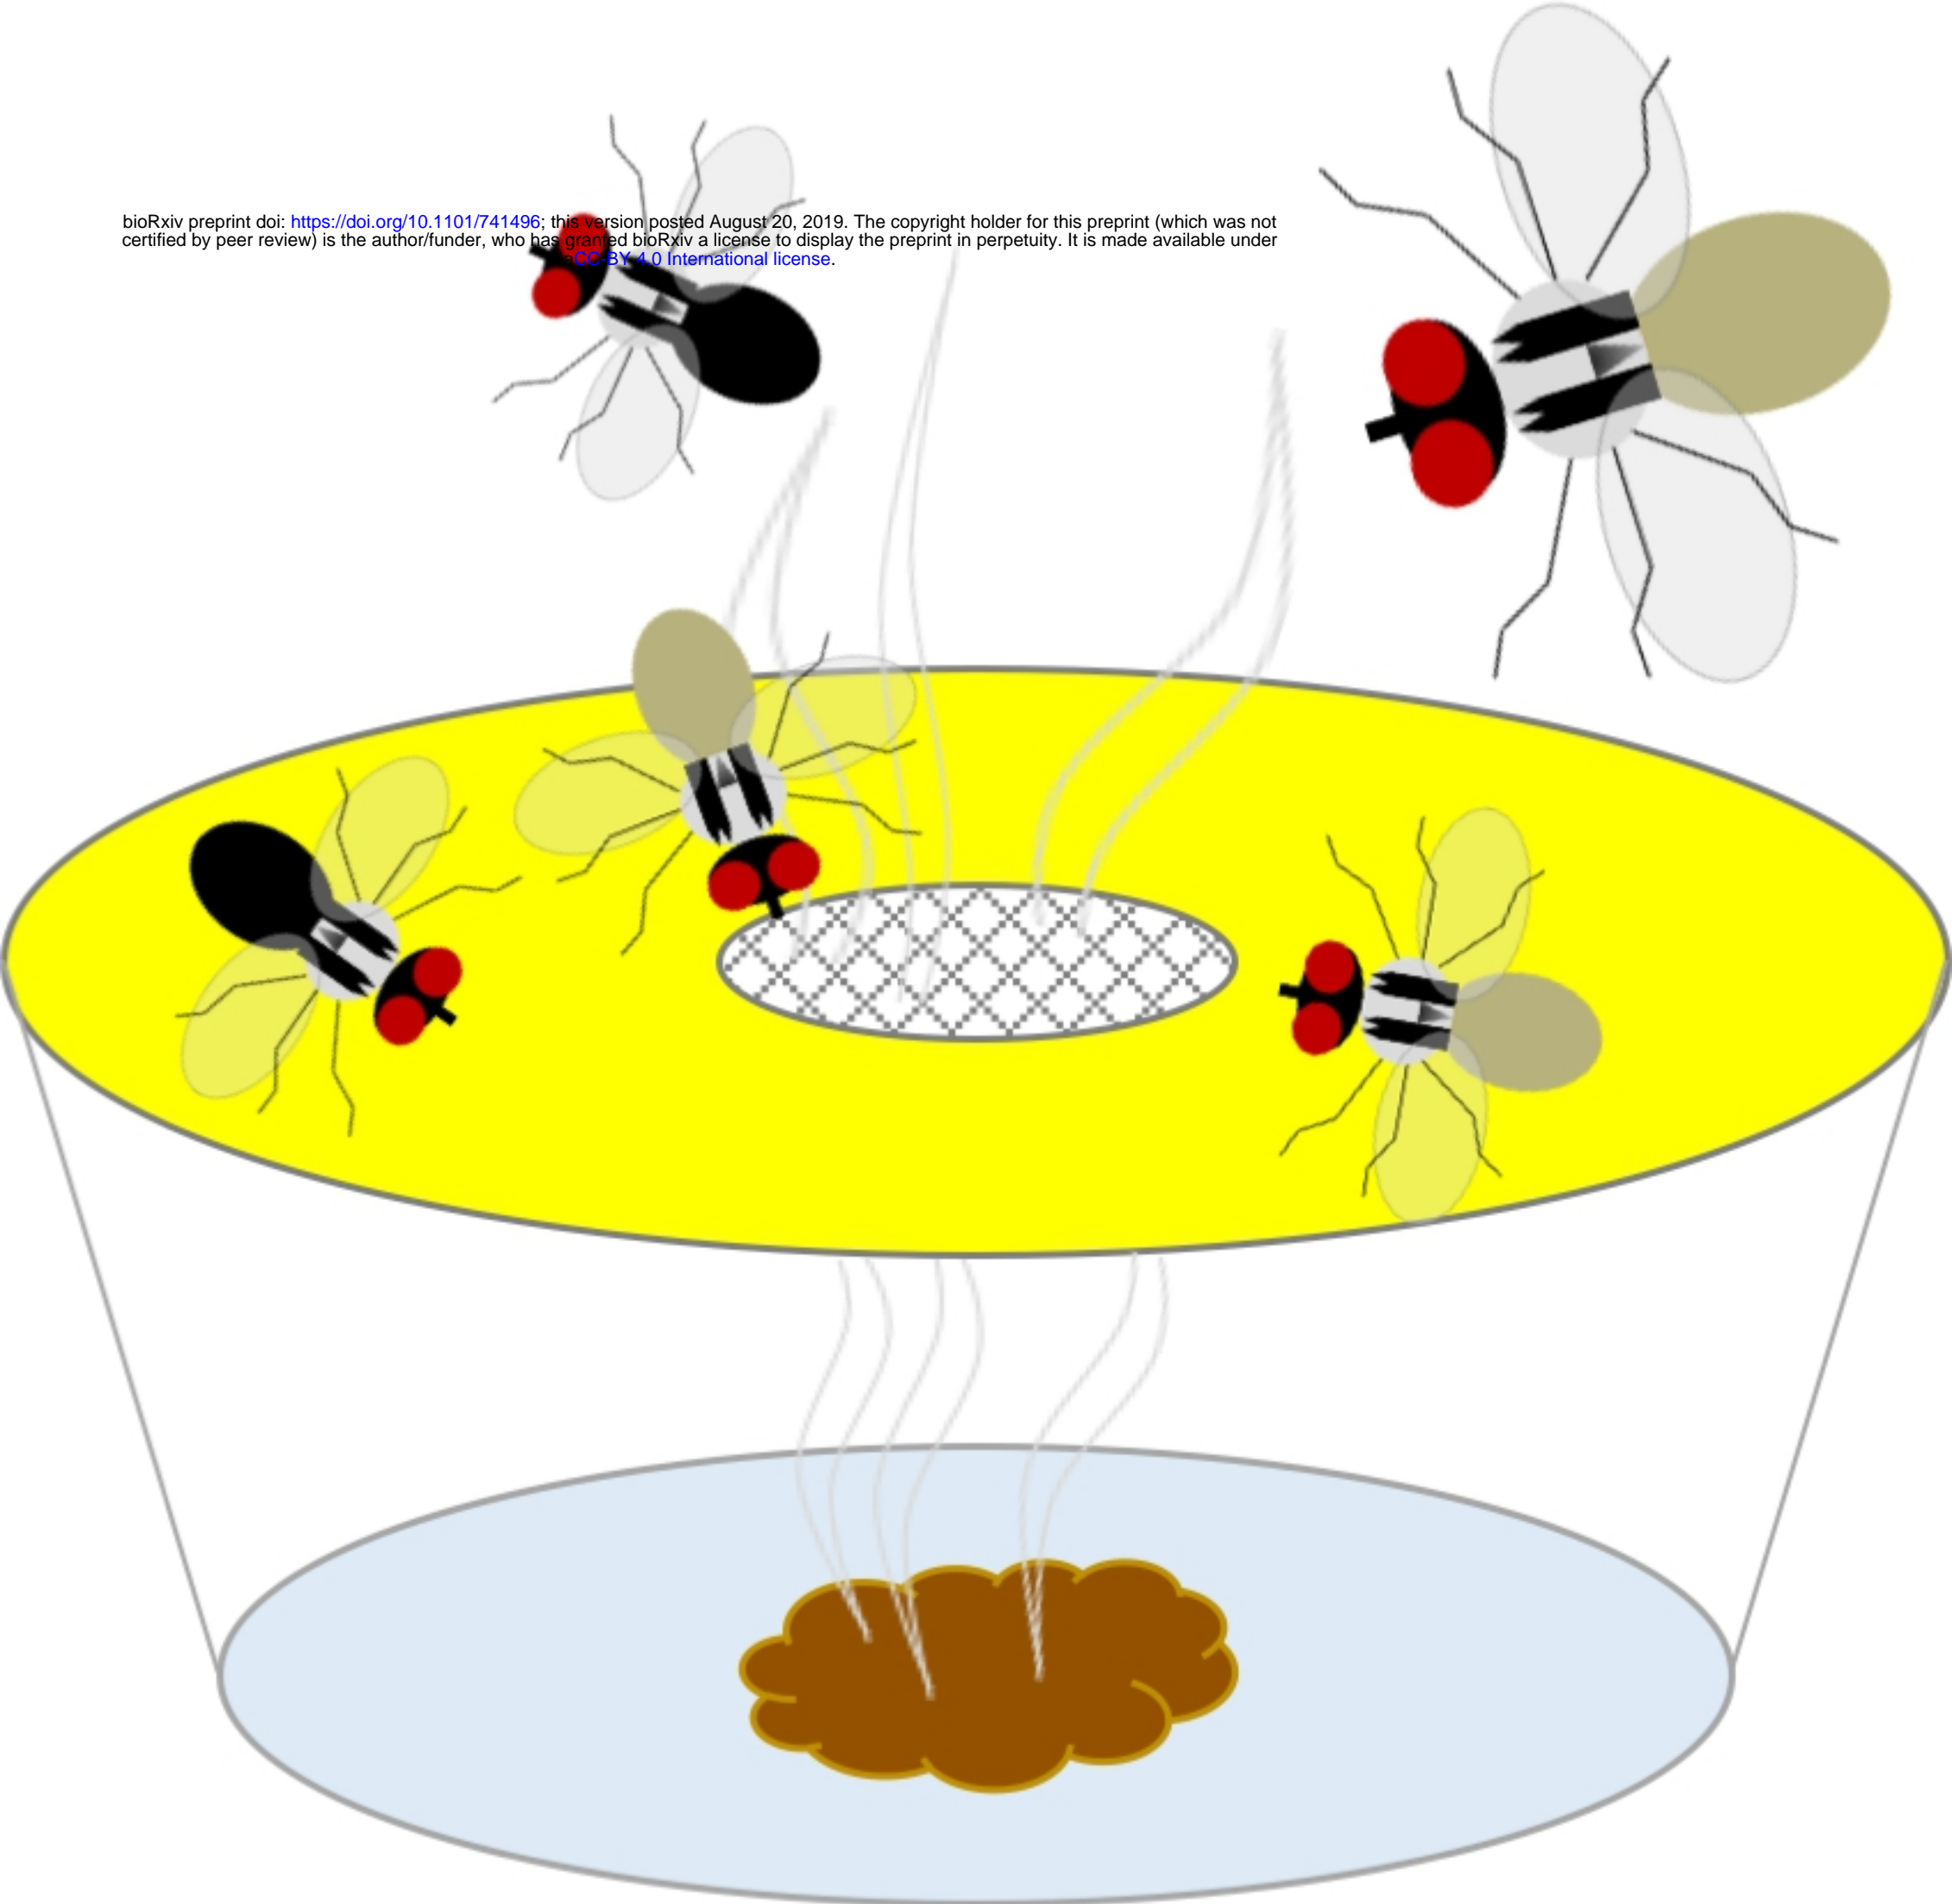

Figure 1A

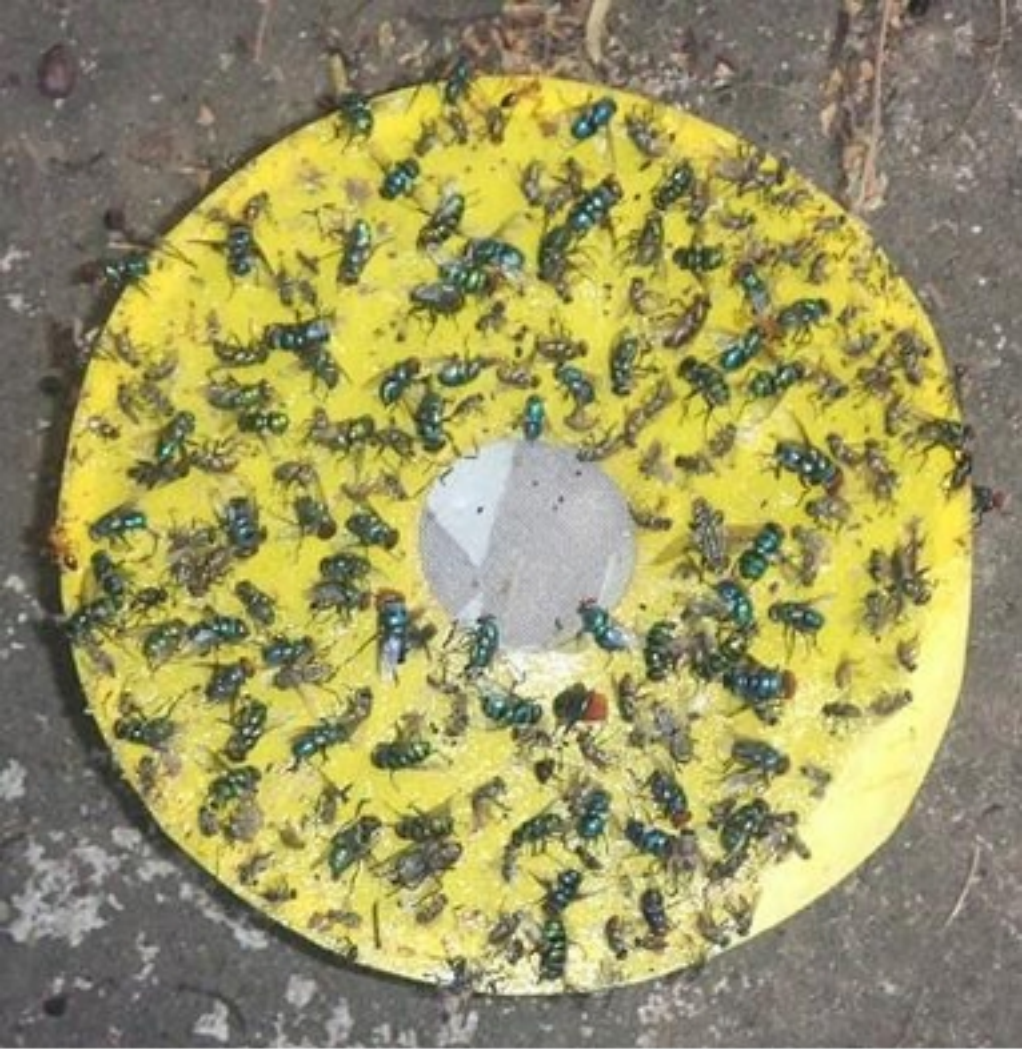

Figure 1B

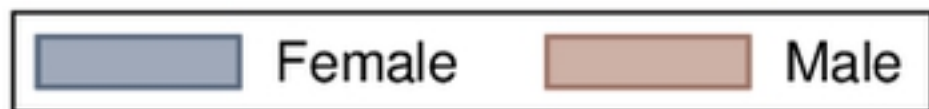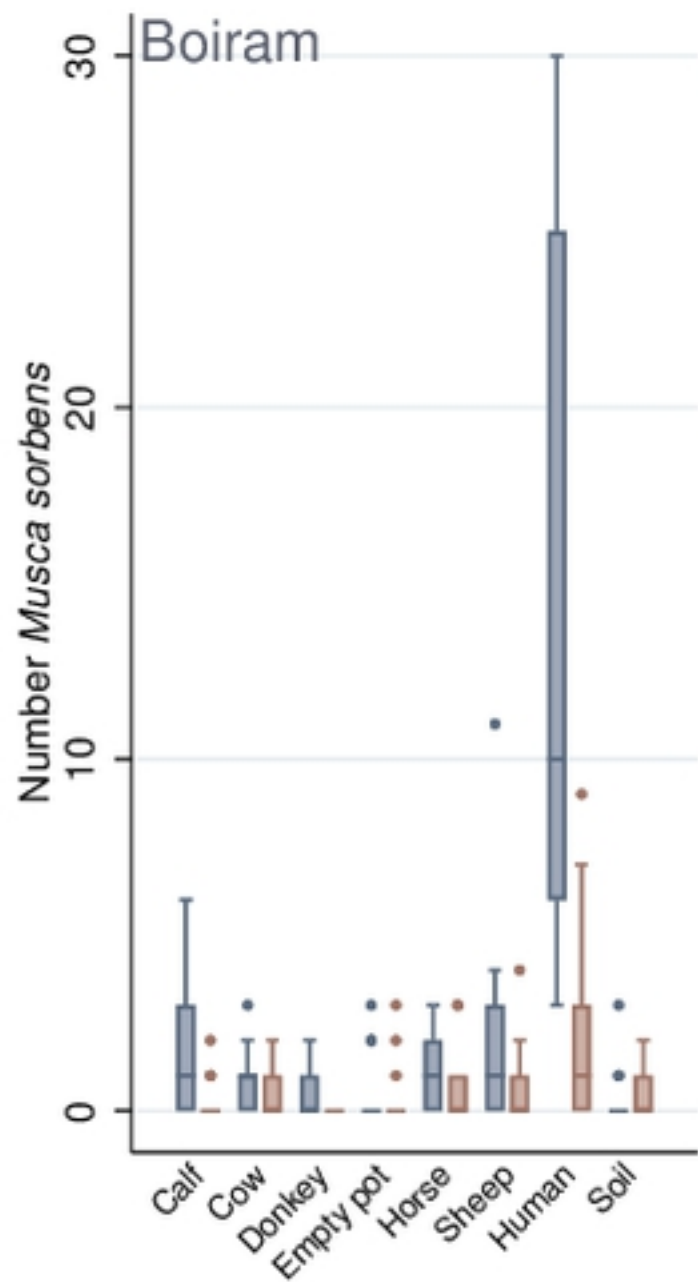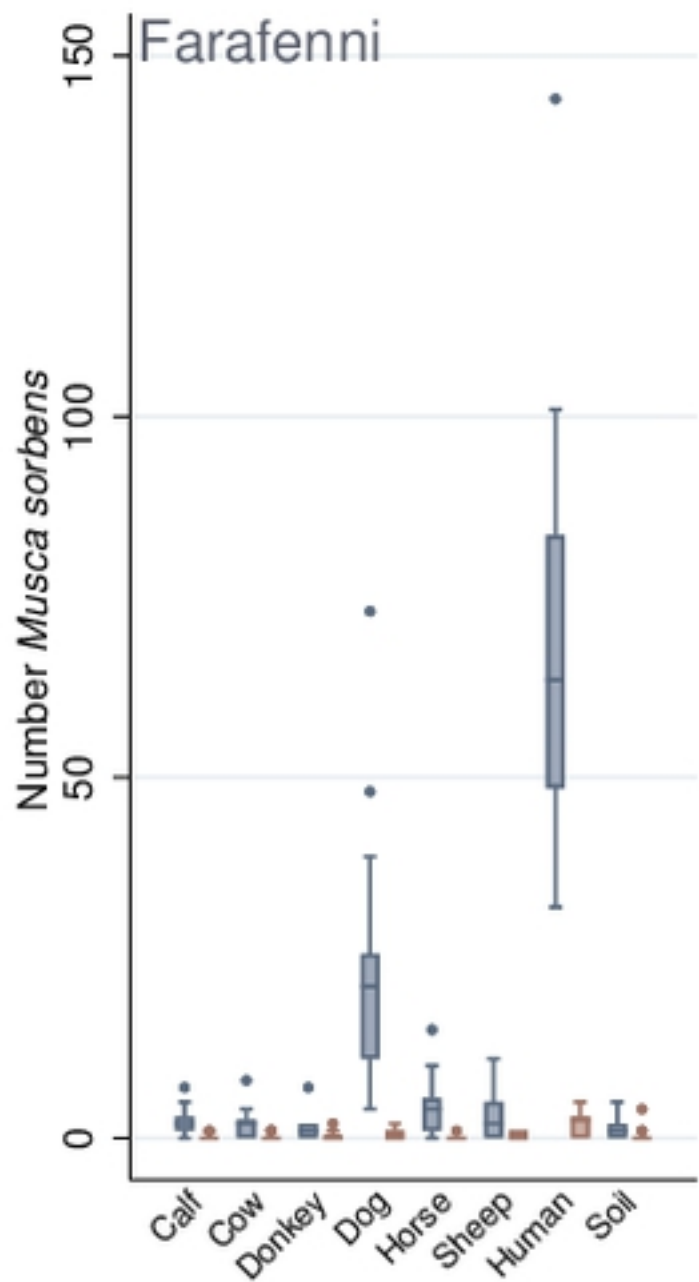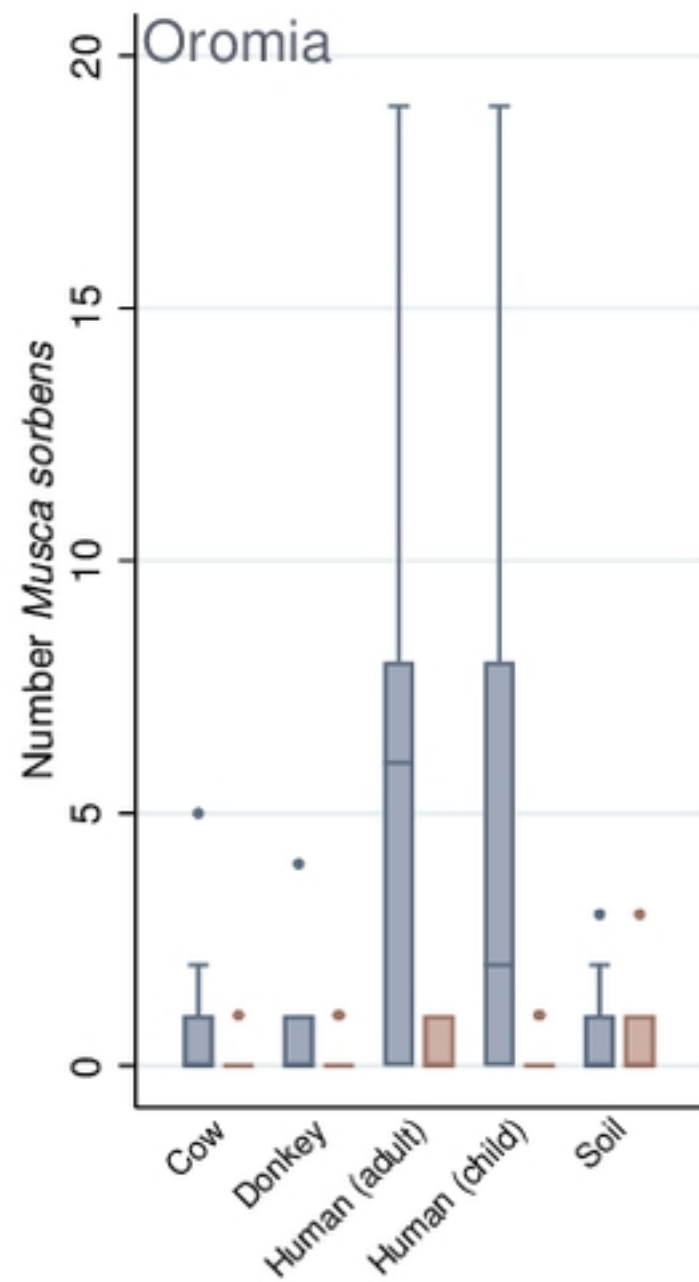

Figure 2
